# Supplementary material
Source: PubMed Central journal article supplement (PMC4969008)
Supplement: NIHMS796673-supplement-2.pdf [file NIHMS796673-supplement-2.pdf]

## Experimental

### Crystal data

$C_{15}H_{23}N_3O \cdot C_{15}H_{23}N_3O$

$M_r = 522.73$

Triclinic

$P1$

$a = 7.957 (2) \text{ \AA}$

$b = 9.400 (2) \text{ \AA}$

$c = 10.711 (3) \text{ \AA}$

$\alpha = 106.514 (9)^\circ$

$\beta = 98.163 (9)^\circ$

$\gamma = 104.922 (8)^\circ$

$V = 721.9 (3) \text{ \AA}^3$

$Z = 1$

$D_x = 1.202 \text{ Mg m}^{-3}$

$D_m$  not measured

Mo  $K\alpha$  radiation

$\lambda = 0.71073 \text{ \AA}$

Cell parameters from 3837 reflections

$\theta = 2.5\text{--}30.5^\circ$

$\mu = 0.077 \text{ mm}^{-1}$

$T = 102 \text{ K}$

Prism

Colorless

$0.42 \times 0.28 \times 0.25 \text{ mm}$

Crystal source: local laboratory

### Data collection

KappaCCD (with Oxford Cryostream) diffractometer

$\omega$  scans with  $\kappa$  offsets

Absorption correction: none

18736 measured reflections

4300 independent reflections

3999 reflections with

$I > 2\sigma(I)$

$R_{\text{int}} = 0.018$

$\theta_{\text{max}} = 30.5^\circ$

$h = -11 \rightarrow 11$

$k = -12 \rightarrow 13$

$l = -15 \rightarrow 15$

intensity decay:  $<2\%$

### Refinement

Refinement on  $F^2$

$R[F^2 > 2\sigma(F^2)] = 0.033$

$wR(F^2) = 0.089$

$S = 1.040$

4300 reflections

366 parameters

H atoms treated by a mixture of independent and constrained refinement

$w = 1/[\sigma^2(F_o^2) + (0.0497P)^2 + 0.0950P]$

where  $P = (F_o^2 + 2F_c^2)/3$

$(\Delta/\sigma)_{\text{max}} = 0.001$

$\Delta\rho_{\text{max}} = 0.28 \text{ e \AA}^{-3}$

$\Delta\rho_{\text{min}} = -0.22 \text{ e \AA}^{-3}$

Extinction correction: *SHELXL*

Extinction coefficient: 0.012 (5)

Scattering factors from *International Tables for Crystallography* (Vol. C)

Table 1. *Fractional atomic coordinates and equivalent isotropic displacement parameters* ( $\text{\AA}^2$ )
$$U_{\text{eq}} = (1/3)\sum_i\sum_j U^{ij} a^i a^j \mathbf{a}_i \cdot \mathbf{a}_j.$$

|     | $x$          | $y$          | $z$          | $U_{\text{eq}}$ |
|-----|--------------|--------------|--------------|-----------------|
| O1  | 0.69923 (15) | 0.93850 (14) | 0.42641 (11) | 0.0182 (2)      |
| N1  | 0.33390 (18) | 0.77416 (15) | 0.41648 (12) | 0.0156 (2)      |
| N2  | 0.10780 (19) | 0.72188 (17) | 0.52745 (14) | 0.0211 (3)      |
| N3  | 0.18622 (18) | 0.51131 (15) | 0.41086 (13) | 0.0177 (3)      |
| C2  | 0.2114 (2)   | 0.66842 (17) | 0.44790 (14) | 0.0160 (3)      |
| C4  | 0.3061 (2)   | 0.30039 (18) | 0.28525 (16) | 0.0198 (3)      |
| C5  | 0.4897 (2)   | 0.33034 (18) | 0.24665 (16) | 0.0207 (3)      |
| C6  | 0.7054 (2)   | 0.59722 (19) | 0.24390 (17) | 0.0206 (3)      |
| C7  | 0.6920 (2)   | 0.74767 (19) | 0.21812 (16) | 0.0195 (3)      |
| C8  | 0.5797 (2)   | 0.83326 (18) | 0.30257 (15) | 0.0152 (3)      |
| C9  | 0.8786 (2)   | 0.8592 (2)   | 0.2340 (2)   | 0.0286 (4)      |
| C3A | 0.2895 (2)   | 0.46229 (17) | 0.33282 (14) | 0.0160 (3)      |
| C5A | 0.5184 (2)   | 0.48056 (18) | 0.20807 (15) | 0.0173 (3)      |
| C8A | 0.4334 (2)   | 0.71776 (17) | 0.33523 (14) | 0.0147 (3)      |
| C8B | 0.4087 (2)   | 0.56072 (17) | 0.28692 (14) | 0.0152 (3)      |
| C1' | 0.4921 (2)   | 0.92293 (18) | 0.22702 (15) | 0.0176 (3)      |
| C2' | 0.3452 (2)   | 0.8183 (2)   | 0.10164 (16) | 0.0225 (3)      |
| C3' | 0.2475 (2)   | 0.9069 (2)   | 0.03653 (18) | 0.0245 (3)      |
| C4' | 0.1018 (3)   | 0.8003 (3)   | -0.0875 (2)  | 0.0347 (4)      |
| O2  | 0.26334 (15) | 0.05299 (13) | 0.53910 (11) | 0.0185 (2)      |
| N4  | 0.80175 (18) | 0.48979 (15) | 0.56881 (13) | 0.0176 (3)      |
| N5  | 0.8927 (2)   | 0.27876 (18) | 0.47215 (15) | 0.0221 (3)      |
| N6  | 0.64366 (17) | 0.22785 (15) | 0.55959 (12) | 0.0154 (2)      |
| C10 | 0.7753 (2)   | 0.33249 (18) | 0.53463 (15) | 0.0166 (3)      |
| C11 | 0.5222 (2)   | 0.28263 (18) | 0.61752 (14) | 0.0151 (3)      |
| C12 | 0.3811 (2)   | 0.17306 (17) | 0.65861 (15) | 0.0159 (3)      |
| C13 | 0.2549 (2)   | 0.25948 (18) | 0.72213 (16) | 0.0193 (3)      |
| C14 | 0.3456 (2)   | 0.43417 (18) | 0.80632 (15) | 0.0197 (3)      |
| C15 | 0.4161 (2)   | 0.51969 (18) | 0.71350 (15) | 0.0178 (3)      |
| C16 | 0.5451 (2)   | 0.68989 (18) | 0.77192 (16) | 0.0213 (3)      |
| C17 | 0.6683 (2)   | 0.70131 (18) | 0.67263 (16) | 0.0196 (3)      |
| C18 | 0.6760 (2)   | 0.53638 (18) | 0.62153 (14) | 0.0166 (3)      |
| C19 | 0.5299 (2)   | 0.43612 (17) | 0.64335 (14) | 0.0159 (3)      |
| C20 | 0.1428 (3)   | 0.1721 (2)   | 0.7979 (2)   | 0.0309 (4)      |
| C21 | 0.4727 (2)   | 0.09561 (19) | 0.74432 (15) | 0.0176 (3)      |
| C22 | 0.6111 (2)   | 0.20561 (19) | 0.87252 (15) | 0.0201 (3)      |

|     |            |            |              |            |
|-----|------------|------------|--------------|------------|
| C23 | 0.7137 (2) | 0.1186 (2) | 0.93802 (17) | 0.0221 (3) |
| C24 | 0.8558 (3) | 0.2245 (2) | 1.0636 (2)   | 0.0303 (4) |

Table 2. *Hydrogen-bonding geometry* ( $\text{\AA}$ ,  $^\circ$ )

| $D-H \cdots A$                     | $D-H$    | $H \cdots A$ | $D \cdots A$ | $D-H \cdots A$ |
|------------------------------------|----------|--------------|--------------|----------------|
| O1—H1O $\cdots$ N6 <sup>i</sup>    | 0.87 (2) | 2.10 (2)     | 2.8672 (19)  | 147 (2)        |
| N2—H21N $\cdots$ O2 <sup>i</sup>   | 0.86 (2) | 2.24 (2)     | 2.998 (2)    | 147.5 (19)     |
| N2—H22N $\cdots$ N4 <sup>ii</sup>  | 0.90 (2) | 2.10 (2)     | 3.001 (2)    | 177.8 (19)     |
| O2—H2O $\cdots$ N1 <sup>iii</sup>  | 0.89 (2) | 1.97 (2)     | 2.8142 (18)  | 157 (2)        |
| N5—H51N $\cdots$ O1 <sup>iii</sup> | 0.89 (2) | 2.27 (3)     | 3.033 (2)    | 144 (2)        |
| N5—H52N $\cdots$ N3 <sup>iv</sup>  | 0.86 (3) | 2.19 (3)     | 3.047 (2)    | 176 (2)        |

Symmetry codes: (i)  $x, 1 + y, z$ ; (ii)  $x - 1, y, z$ ; (iii)  $x, y - 1, z$ ; (iv)  $1 + x, y, z$ .

Table 3. *Fractional atomic coordinates and equivalent isotropic displacement parameters* ( $\text{\AA}^2$ )
$$U_{\text{eq}} = (1/3)\sum_i\sum_j U^{ij} a^i a^j \mathbf{a}_i \cdot \mathbf{a}_j.$$

|     | $x$          | $y$          | $z$          | $U_{\text{eq}}$ |
|-----|--------------|--------------|--------------|-----------------|
| O1  | 0.69923 (15) | 0.93850 (14) | 0.42641 (11) | 0.0182 (2)      |
| N1  | 0.33390 (18) | 0.77416 (15) | 0.41648 (12) | 0.0156 (2)      |
| N2  | 0.10780 (19) | 0.72188 (17) | 0.52745 (14) | 0.0211 (3)      |
| N3  | 0.18622 (18) | 0.51131 (15) | 0.41086 (13) | 0.0177 (3)      |
| C2  | 0.2114 (2)   | 0.66842 (17) | 0.44790 (14) | 0.0160 (3)      |
| C4  | 0.3061 (2)   | 0.30039 (18) | 0.28525 (16) | 0.0198 (3)      |
| C5  | 0.4897 (2)   | 0.33034 (18) | 0.24665 (16) | 0.0207 (3)      |
| C6  | 0.7054 (2)   | 0.59722 (19) | 0.24390 (17) | 0.0206 (3)      |
| C7  | 0.6920 (2)   | 0.74767 (19) | 0.21812 (16) | 0.0195 (3)      |
| C8  | 0.5797 (2)   | 0.83326 (18) | 0.30257 (15) | 0.0152 (3)      |
| C9  | 0.8786 (2)   | 0.8592 (2)   | 0.2340 (2)   | 0.0286 (4)      |
| C3A | 0.2895 (2)   | 0.46229 (17) | 0.33282 (14) | 0.0160 (3)      |
| C5A | 0.5184 (2)   | 0.48056 (18) | 0.20807 (15) | 0.0173 (3)      |
| C8A | 0.4334 (2)   | 0.71776 (17) | 0.33523 (14) | 0.0147 (3)      |
| C8B | 0.4087 (2)   | 0.56072 (17) | 0.28692 (14) | 0.0152 (3)      |
| C1' | 0.4921 (2)   | 0.92293 (18) | 0.22702 (15) | 0.0176 (3)      |
| C2' | 0.3452 (2)   | 0.8183 (2)   | 0.10164 (16) | 0.0225 (3)      |
| C3' | 0.2475 (2)   | 0.9069 (2)   | 0.03653 (18) | 0.0245 (3)      |
| C4' | 0.1018 (3)   | 0.8003 (3)   | -0.0875 (2)  | 0.0347 (4)      |
| O2  | 0.26334 (15) | 0.05299 (13) | 0.53910 (11) | 0.0185 (2)      |
| N4  | 0.80175 (18) | 0.48979 (15) | 0.56881 (13) | 0.0176 (3)      |
| N5  | 0.8927 (2)   | 0.27876 (18) | 0.47215 (15) | 0.0221 (3)      |
| N6  | 0.64366 (17) | 0.22785 (15) | 0.55959 (12) | 0.0154 (2)      |
| C10 | 0.7753 (2)   | 0.33249 (18) | 0.53463 (15) | 0.0166 (3)      |
| C11 | 0.5222 (2)   | 0.28263 (18) | 0.61752 (14) | 0.0151 (3)      |
| C12 | 0.3811 (2)   | 0.17306 (17) | 0.65861 (15) | 0.0159 (3)      |
| C13 | 0.2549 (2)   | 0.25948 (18) | 0.72213 (16) | 0.0193 (3)      |
| C14 | 0.3456 (2)   | 0.43417 (18) | 0.80632 (15) | 0.0197 (3)      |
| C15 | 0.4161 (2)   | 0.51969 (18) | 0.71350 (15) | 0.0178 (3)      |
| C16 | 0.5451 (2)   | 0.68989 (18) | 0.77192 (16) | 0.0213 (3)      |
| C17 | 0.6683 (2)   | 0.70131 (18) | 0.67263 (16) | 0.0196 (3)      |
| C18 | 0.6760 (2)   | 0.53638 (18) | 0.62153 (14) | 0.0166 (3)      |
| C19 | 0.5299 (2)   | 0.43612 (17) | 0.64335 (14) | 0.0159 (3)      |
| C20 | 0.1428 (3)   | 0.1721 (2)   | 0.7979 (2)   | 0.0309 (4)      |
| C21 | 0.4727 (2)   | 0.09561 (19) | 0.74432 (15) | 0.0176 (3)      |
| C22 | 0.6111 (2)   | 0.20561 (19) | 0.87252 (15) | 0.0201 (3)      |

|     |            |            |              |            |
|-----|------------|------------|--------------|------------|
| C23 | 0.7137 (2) | 0.1186 (2) | 0.93802 (17) | 0.0221 (3) |
| C24 | 0.8558 (3) | 0.2245 (2) | 1.0636 (2)   | 0.0303 (4) |

Table 4. *Anisotropic displacement parameters* ( $\text{\AA}^2$ )

|     | $U_{11}$    | $U_{22}$    | $U_{33}$    | $U_{12}$   | $U_{13}$    | $U_{23}$   |
|-----|-------------|-------------|-------------|------------|-------------|------------|
| O1  | 0.0160 (5)  | 0.0168 (5)  | 0.0188 (5)  | 0.0026 (4) | 0.0040 (4)  | 0.0038 (4) |
| N1  | 0.0171 (6)  | 0.0131 (6)  | 0.0158 (5)  | 0.0025 (5) | 0.0055 (5)  | 0.0050 (4) |
| N2  | 0.0227 (7)  | 0.0141 (6)  | 0.0276 (7)  | 0.0027 (5) | 0.0139 (6)  | 0.0072 (5) |
| N3  | 0.0187 (6)  | 0.0150 (6)  | 0.0181 (6)  | 0.0029 (5) | 0.0042 (5)  | 0.0056 (5) |
| C2  | 0.0169 (7)  | 0.0144 (7)  | 0.0153 (6)  | 0.0027 (5) | 0.0040 (5)  | 0.0048 (5) |
| C4  | 0.0227 (8)  | 0.0129 (7)  | 0.0222 (7)  | 0.0046 (6) | 0.0034 (6)  | 0.0053 (5) |
| C5  | 0.0223 (7)  | 0.0157 (7)  | 0.0236 (7)  | 0.0066 (6) | 0.0027 (6)  | 0.0066 (6) |
| C6  | 0.0197 (7)  | 0.0184 (7)  | 0.0260 (7)  | 0.0085 (6) | 0.0082 (6)  | 0.0075 (6) |
| C7  | 0.0206 (7)  | 0.0195 (7)  | 0.0218 (7)  | 0.0081 (6) | 0.0103 (6)  | 0.0079 (6) |
| C8  | 0.0162 (7)  | 0.0130 (7)  | 0.0160 (6)  | 0.0023 (5) | 0.0058 (5)  | 0.0054 (5) |
| C9  | 0.0258 (8)  | 0.0253 (9)  | 0.0407 (10) | 0.0094 (7) | 0.0198 (8)  | 0.0129 (7) |
| C3A | 0.0174 (7)  | 0.0125 (7)  | 0.0153 (6)  | 0.0024 (5) | 0.0010 (5)  | 0.0038 (5) |
| C5A | 0.0210 (7)  | 0.0147 (7)  | 0.0171 (6)  | 0.0077 (6) | 0.0054 (5)  | 0.0043 (5) |
| C8A | 0.0157 (7)  | 0.0147 (7)  | 0.0131 (6)  | 0.0036 (5) | 0.0029 (5)  | 0.0051 (5) |
| C8B | 0.0168 (7)  | 0.0148 (7)  | 0.0138 (6)  | 0.0050 (5) | 0.0036 (5)  | 0.0045 (5) |
| C1' | 0.0210 (7)  | 0.0151 (7)  | 0.0172 (6)  | 0.0046 (6) | 0.0055 (5)  | 0.0067 (5) |
| C2' | 0.0287 (8)  | 0.0186 (8)  | 0.0181 (7)  | 0.0076 (6) | 0.0022 (6)  | 0.0044 (6) |
| C3' | 0.0221 (8)  | 0.0236 (8)  | 0.0274 (8)  | 0.0045 (6) | 0.0019 (6)  | 0.0123 (6) |
| C4' | 0.0311 (10) | 0.0376 (11) | 0.0305 (9)  | 0.0050 (8) | -0.0032 (8) | 0.0145 (8) |
| O2  | 0.0180 (5)  | 0.0139 (5)  | 0.0197 (5)  | 0.0025 (4) | 0.0038 (4)  | 0.0022 (4) |
| N4  | 0.0201 (6)  | 0.0136 (6)  | 0.0186 (6)  | 0.0026 (5) | 0.0054 (5)  | 0.0066 (5) |
| N5  | 0.0215 (7)  | 0.0155 (7)  | 0.0310 (7)  | 0.0034 (5) | 0.0131 (6)  | 0.0092 (5) |
| N6  | 0.0160 (6)  | 0.0140 (6)  | 0.0159 (5)  | 0.0033 (5) | 0.0046 (5)  | 0.0055 (4) |
| C10 | 0.0166 (7)  | 0.0164 (7)  | 0.0163 (6)  | 0.0038 (6) | 0.0030 (5)  | 0.0063 (5) |
| C11 | 0.0159 (7)  | 0.0139 (7)  | 0.0134 (6)  | 0.0028 (5) | 0.0026 (5)  | 0.0037 (5) |
| C12 | 0.0173 (7)  | 0.0137 (7)  | 0.0164 (6)  | 0.0035 (6) | 0.0056 (5)  | 0.0052 (5) |
| C13 | 0.0196 (7)  | 0.0166 (7)  | 0.0225 (7)  | 0.0053 (6) | 0.0093 (6)  | 0.0062 (6) |
| C14 | 0.0254 (8)  | 0.0161 (7)  | 0.0191 (7)  | 0.0077 (6) | 0.0085 (6)  | 0.0055 (5) |
| C15 | 0.0213 (7)  | 0.0144 (7)  | 0.0176 (6)  | 0.0059 (6) | 0.0041 (5)  | 0.0050 (5) |
| C16 | 0.0268 (8)  | 0.0133 (7)  | 0.0224 (7)  | 0.0057 (6) | 0.0065 (6)  | 0.0040 (5) |
| C17 | 0.0228 (7)  | 0.0135 (7)  | 0.0205 (7)  | 0.0035 (6) | 0.0031 (6)  | 0.0055 (5) |
| C18 | 0.0195 (7)  | 0.0137 (7)  | 0.0151 (6)  | 0.0031 (6) | 0.0015 (5)  | 0.0056 (5) |
| C19 | 0.0181 (7)  | 0.0146 (7)  | 0.0134 (6)  | 0.0042 (5) | 0.0029 (5)  | 0.0036 (5) |
| C20 | 0.0337 (10) | 0.0233 (9)  | 0.0428 (10) | 0.0096 (7) | 0.0250 (8)  | 0.0131 (8) |
| C21 | 0.0207 (7)  | 0.0151 (7)  | 0.0185 (6)  | 0.0044 (5) | 0.0071 (5)  | 0.0076 (5) |
| C22 | 0.0251 (8)  | 0.0180 (7)  | 0.0174 (7)  | 0.0067 (6) | 0.0047 (6)  | 0.0064 (5) |

|     |            |             |            |            |            |            |
|-----|------------|-------------|------------|------------|------------|------------|
| C23 | 0.0192 (7) | 0.0221 (8)  | 0.0265 (8) | 0.0066 (6) | 0.0053 (6) | 0.0102 (6) |
| C24 | 0.0256 (9) | 0.0347 (10) | 0.0297 (9) | 0.0094 (7) | 0.0016 (7) | 0.0118 (7) |

Table 5. *Selected geometric parameters* ( $\text{\AA}$ ,  $^\circ$ )

|          |             |          |             |
|----------|-------------|----------|-------------|
| O1—C8    | 1.4333 (18) | C2'—H2'1 | 0.9900      |
| O1—H1O   | 0.87 (2)    | C2'—H2'2 | 0.9900      |
| N1—C8A   | 1.3473 (19) | C3'—C4'  | 1.524 (3)   |
| N1—C2    | 1.355 (2)   | C3'—H3'1 | 0.9900      |
| N2—C2    | 1.352 (2)   | C3'—H3'2 | 0.9900      |
| N2—H21N  | 0.86 (2)    | C4'—H4'1 | 0.9800      |
| N2—H22N  | 0.90 (2)    | C4'—H4'2 | 0.9800      |
| N3—C3A   | 1.326 (2)   | C4'—H4'3 | 0.9800      |
| N3—C2    | 1.368 (2)   | O2—C12   | 1.4435 (18) |
| C4—C3A   | 1.508 (2)   | O2—H2O   | 0.89 (2)    |
| C4—C5    | 1.553 (2)   | N4—C18   | 1.326 (2)   |
| C4—H4A   | 0.9900      | N4—C10   | 1.369 (2)   |
| C4—H4B   | 0.9900      | N5—C10   | 1.343 (2)   |
| C5—C5A   | 1.552 (2)   | N5—H51N  | 0.89 (2)    |
| C5—H5A   | 0.9900      | N5—H52N  | 0.86 (3)    |
| C5—H5B   | 0.9900      | N6—C11   | 1.3521 (19) |
| C6—C5A   | 1.524 (2)   | N6—C10   | 1.354 (2)   |
| C6—C7    | 1.542 (2)   | C11—C19  | 1.373 (2)   |
| C6—H6A   | 0.9900      | C11—C12  | 1.523 (2)   |
| C6—H6B   | 0.9900      | C12—C21  | 1.539 (2)   |
| C7—C9    | 1.536 (2)   | C12—C13  | 1.559 (2)   |
| C7—C8    | 1.565 (2)   | C13—C20  | 1.528 (2)   |
| C7—H7    | 1.0000      | C13—C14  | 1.547 (2)   |
| C8—C8A   | 1.528 (2)   | C13—H13  | 1.0000      |
| C8—C1'   | 1.543 (2)   | C14—C15  | 1.527 (2)   |
| C9—H9A   | 0.9800      | C14—H14A | 0.9900      |
| C9—H9B   | 0.9800      | C14—H14B | 0.9900      |
| C9—H9C   | 0.9800      | C15—C19  | 1.492 (2)   |
| C3A—C8B  | 1.392 (2)   | C15—C16  | 1.552 (2)   |
| C5A—C8B  | 1.493 (2)   | C15—H15  | 1.0000      |
| C5A—H5A1 | 1.0000      | C16—C17  | 1.553 (2)   |
| C8A—C8B  | 1.369 (2)   | C16—H16A | 0.9900      |
| C1'—C2'  | 1.533 (2)   | C16—H16B | 0.9900      |
| C1'—H1'1 | 0.9900      | C17—C18  | 1.511 (2)   |
| C1'—H1'2 | 0.9900      | C17—H17A | 0.9900      |
| C2'—C3'  | 1.515 (2)   | C17—H17B | 0.9900      |

|              |             |              |             |
|--------------|-------------|--------------|-------------|
| C18—C19      | 1.390 (2)   | C22—H22A     | 0.9900      |
| C20—H20A     | 0.9800      | C22—H22B     | 0.9900      |
| C20—H20B     | 0.9800      | C23—C24      | 1.518 (3)   |
| C20—H20C     | 0.9800      | C23—H23A     | 0.9900      |
| C21—C22      | 1.531 (2)   | C23—H23B     | 0.9900      |
| C21—H21A     | 0.9900      | C24—H24A     | 0.9800      |
| C21—H21B     | 0.9900      | C24—H24B     | 0.9800      |
| C22—C23      | 1.528 (2)   | C24—H24C     | 0.9800      |
| C8—O1—H1O    | 106.1 (16)  | C6—C7—H7     | 106.5       |
| C8A—N1—C2    | 116.75 (13) | C8—C7—H7     | 106.5       |
| C2—N2—H21N   | 117.1 (14)  | O1—C8—C8A    | 107.86 (12) |
| C2—N2—H22N   | 118.4 (13)  | O1—C8—C1'    | 110.68 (13) |
| H21N—N2—H22N | 124 (2)     | C8A—C8—C1'   | 108.86 (12) |
| C3A—N3—C2    | 114.64 (13) | O1—C8—C7     | 107.23 (13) |
| N2—C2—N1     | 117.86 (14) | C8A—C8—C7    | 111.25 (12) |
| N2—C2—N3     | 116.00 (14) | C1'—C8—C7    | 110.91 (12) |
| N1—C2—N3     | 126.09 (14) | C7—C9—H9A    | 109.5       |
| C3A—C4—C5    | 102.66 (13) | C7—C9—H9B    | 109.5       |
| C3A—C4—H4A   | 111.2       | H9A—C9—H9B   | 109.5       |
| C5—C4—H4A    | 111.2       | C7—C9—H9C    | 109.5       |
| C3A—C4—H4B   | 111.2       | H9A—C9—H9C   | 109.5       |
| C5—C4—H4B    | 111.2       | H9B—C9—H9C   | 109.5       |
| H4A—C4—H4B   | 109.1       | N3—C3A—C8B   | 123.06 (14) |
| C5A—C5—C4    | 105.69 (12) | N3—C3A—C4    | 127.60 (14) |
| C5A—C5—H5A   | 110.6       | C8B—C3A—C4   | 109.28 (14) |
| C4—C5—H5A    | 110.6       | C8B—C5A—C6   | 107.03 (13) |
| C5A—C5—H5B   | 110.6       | C8B—C5A—C5   | 101.45 (13) |
| C4—C5—H5B    | 110.6       | C6—C5A—C5    | 119.75 (13) |
| H5A—C5—H5B   | 108.7       | C8B—C5A—H5A1 | 109.3       |
| C5A—C6—C7    | 109.15 (13) | C6—C5A—H5A1  | 109.3       |
| C5A—C6—H6A   | 109.9       | C5—C5A—H5A1  | 109.3       |
| C7—C6—H6A    | 109.9       | N1—C8A—C8B   | 120.73 (14) |
| C5A—C6—H6B   | 109.9       | N1—C8A—C8    | 118.64 (13) |
| C7—C6—H6B    | 109.9       | C8B—C8A—C8   | 120.58 (13) |
| H6A—C6—H6B   | 108.3       | C8A—C8B—C3A  | 118.36 (13) |
| C9—C7—C6     | 110.78 (14) | C8A—C8B—C5A  | 127.61 (14) |
| C9—C7—C8     | 111.31 (13) | C3A—C8B—C5A  | 113.05 (13) |
| C6—C7—C8     | 114.70 (13) | C2'—C1'—C8   | 114.42 (13) |
| C9—C7—H7     | 106.5       | C2'—C1'—H1'1 | 108.7       |

|               |             |               |             |
|---------------|-------------|---------------|-------------|
| C8—C1'—H1'1   | 108.7       | C21—C12—C13   | 115.96 (13) |
| C2'—C1'—H1'2  | 108.7       | C20—C13—C14   | 111.54 (14) |
| C8—C1'—H1'2   | 108.7       | C20—C13—C12   | 112.91 (14) |
| H1'1—C1'—H1'2 | 107.6       | C14—C13—C12   | 115.30 (13) |
| C3'—C2'—C1'   | 113.85 (14) | C20—C13—H13   | 105.4       |
| C3'—C2'—H2'1  | 108.8       | C14—C13—H13   | 105.4       |
| C1'—C2'—H2'1  | 108.8       | C12—C13—H13   | 105.4       |
| C3'—C2'—H2'2  | 108.8       | C15—C14—C13   | 107.99 (12) |
| C1'—C2'—H2'2  | 108.8       | C15—C14—H14A  | 110.1       |
| H2'1—C2'—H2'2 | 107.7       | C13—C14—H14A  | 110.1       |
| C2'—C3'—C4'   | 112.83 (16) | C15—C14—H14B  | 110.1       |
| C2'—C3'—H3'1  | 109.0       | C13—C14—H14B  | 110.1       |
| C4'—C3'—H3'1  | 109.0       | H14A—C14—H14B | 108.4       |
| C2'—C3'—H3'2  | 109.0       | C19—C15—C14   | 107.56 (12) |
| C4'—C3'—H3'2  | 109.0       | C19—C15—C16   | 101.26 (13) |
| H3'1—C3'—H3'2 | 107.8       | C14—C15—C16   | 120.46 (13) |
| C3'—C4'—H4'1  | 109.5       | C19—C15—H15   | 109.0       |
| C3'—C4'—H4'2  | 109.5       | C14—C15—H15   | 109.0       |
| H4'1—C4'—H4'2 | 109.5       | C16—C15—H15   | 109.0       |
| C3'—C4'—H4'3  | 109.5       | C15—C16—C17   | 104.74 (12) |
| H4'1—C4'—H4'3 | 109.5       | C15—C16—H16A  | 110.8       |
| H4'2—C4'—H4'3 | 109.5       | C17—C16—H16A  | 110.8       |
| C12—O2—H2O    | 111.7 (15)  | C15—C16—H16B  | 110.8       |
| C18—N4—C10    | 114.51 (13) | C17—C16—H16B  | 110.8       |
| C10—N5—H51N   | 120.3 (15)  | H16A—C16—H16B | 108.9       |
| C10—N5—H52N   | 120.6 (15)  | C18—C17—C16   | 102.27 (13) |
| H51N—N5—H52N  | 119 (2)     | C18—C17—H17A  | 111.3       |
| C11—N6—C10    | 116.91 (13) | C16—C17—H17A  | 111.3       |
| N5—C10—N6     | 117.65 (14) | C18—C17—H17B  | 111.3       |
| N5—C10—N4     | 116.42 (14) | C16—C17—H17B  | 111.3       |
| N6—C10—N4     | 125.93 (14) | H17A—C17—H17B | 109.2       |
| N6—C11—C19    | 120.56 (14) | N4—C18—C19    | 123.57 (14) |
| N6—C11—C12    | 118.97 (13) | N4—C18—C17    | 127.56 (15) |
| C19—C11—C12   | 120.42 (13) | C19—C18—C17   | 108.82 (14) |
| O2—C12—C11    | 108.50 (12) | C11—C19—C18   | 118.07 (14) |
| O2—C12—C21    | 108.80 (12) | C11—C19—C15   | 128.28 (14) |
| C11—C12—C21   | 109.40 (12) | C18—C19—C15   | 112.88 (13) |
| O2—C12—C13    | 103.40 (12) | C13—C20—H20A  | 109.5       |
| C11—C12—C13   | 110.41 (12) | C13—C20—H20B  | 109.5       |



|               |              |                 |              |
|---------------|--------------|-----------------|--------------|
| H20A—C20—H20B | 109.5        | C21—C22—H22B    | 109.2        |
| C13—C20—H20C  | 109.5        | H22A—C22—H22B   | 107.9        |
| H20A—C20—H20C | 109.5        | C24—C23—C22     | 113.57 (15)  |
| H20B—C20—H20C | 109.5        | C24—C23—H23A    | 108.9        |
| C22—C21—C12   | 116.51 (13)  | C22—C23—H23A    | 108.9        |
| C22—C21—H21A  | 108.2        | C24—C23—H23B    | 108.9        |
| C12—C21—H21A  | 108.2        | C22—C23—H23B    | 108.9        |
| C22—C21—H21B  | 108.2        | H23A—C23—H23B   | 107.7        |
| C12—C21—H21B  | 108.2        | C23—C24—H24A    | 109.5        |
| H21A—C21—H21B | 107.3        | C23—C24—H24B    | 109.5        |
| C23—C22—C21   | 111.98 (14)  | H24A—C24—H24B   | 109.5        |
| C23—C22—H22A  | 109.2        | C23—C24—H24C    | 109.5        |
| C21—C22—H22A  | 109.2        | H24A—C24—H24C   | 109.5        |
| C23—C22—H22B  | 109.2        | H24B—C24—H24C   | 109.5        |
| C8A—N1—C2—N2  | -178.91 (13) | C7—C8—C8A—N1    | 174.78 (13)  |
| C8A—N1—C2—N3  | 3.8 (2)      | O1—C8—C8A—C8B   | -120.14 (14) |
| C3A—N3—C2—N2  | 179.95 (14)  | C1'—C8—C8A—C8B  | 119.72 (14)  |
| C3A—N3—C2—N1  | -2.7 (2)     | C7—C8—C8A—C8B   | -2.80 (19)   |
| C3A—C4—C5—C5A | -27.21 (15)  | N1—C8A—C8B—C3A  | -5.5 (2)     |
| C5A—C6—C7—C9  | -172.04 (13) | C8—C8A—C8B—C3A  | 172.06 (13)  |
| C5A—C6—C7—C8  | 60.92 (17)   | N1—C8A—C8B—C5A  | -173.26 (14) |
| C9—C7—C8—O1   | -38.55 (17)  | C8—C8A—C8B—C5A  | 4.3 (2)      |
| C6—C7—C8—O1   | 88.22 (16)   | N3—C3A—C8B—C8A  | 6.7 (2)      |
| C9—C7—C8—C8A  | -156.27 (14) | C4—C3A—C8B—C8A  | -170.61 (13) |
| C6—C7—C8—C8A  | -29.50 (18)  | N3—C3A—C8B—C5A  | 176.25 (14)  |
| C9—C7—C8—C1'  | 82.40 (17)   | C4—C3A—C8B—C5A  | -1.10 (17)   |
| C6—C7—C8—C1'  | -150.83 (14) | C6—C5A—C8B—C8A  | 26.0 (2)     |
| C2—N3—C3A—C8B | -2.7 (2)     | C5—C5A—C8B—C8A  | 152.30 (15)  |
| C2—N3—C3A—C4  | 174.12 (14)  | C6—C5A—C8B—C3A  | -142.30 (13) |
| C5—C4—C3A—N3  | -159.41 (15) | C5—C5A—C8B—C3A  | -16.03 (16)  |
| C5—C4—C3A—C8B | 17.78 (16)   | O1—C8—C1'—C2'   | -172.97 (13) |
| C7—C6—C5A—C8B | -55.33 (16)  | C8A—C8—C1'—C2'  | -54.59 (16)  |
| C7—C6—C5A—C5  | -169.80 (13) | C7—C8—C1'—C2'   | 68.14 (17)   |
| C4—C5—C5A—C8B | 26.21 (15)   | C8—C1'—C2'—C3'  | 174.06 (14)  |
| C4—C5—C5A—C6  | 143.60 (14)  | C1'—C2'—C3'—C4' | -179.78 (15) |
| C2—N1—C8A—C8B | 0.6 (2)      | C11—N6—C10—N5   | -177.33 (14) |
| C2—N1—C8A—C8  | -177.02 (13) | C11—N6—C10—N4   | 3.5 (2)      |
| O1—C8—C8A—N1  | 57.45 (17)   | C18—N4—C10—N5   | 175.40 (13)  |
| C1'—C8—C8A—N1 | -62.70 (16)  | C18—N4—C10—N6   | -5.5 (2)     |

|                 |              |                 |              |
|-----------------|--------------|-----------------|--------------|
| C10—N6—C11—C19  | 2.9 (2)      | C10—N4—C18—C19  | 1.1 (2)      |
| C10—N6—C11—C12  | -174.80 (13) | C10—N4—C18—C17  | 178.25 (14)  |
| N6—C11—C12—O2   | -66.97 (17)  | C16—C17—C18—N4  | -156.79 (15) |
| C19—C11—C12—O2  | 115.36 (14)  | C16—C17—C18—C19 | 20.70 (16)   |
| N6—C11—C12—C21  | 51.59 (17)   | N6—C11—C19—C18  | -6.7 (2)     |
| C19—C11—C12—C21 | -126.07 (15) | C12—C11—C19—C18 | 170.93 (13)  |
| N6—C11—C12—C13  | -179.63 (13) | N6—C11—C19—C15  | -175.88 (14) |
| C19—C11—C12—C13 | 2.71 (19)    | C12—C11—C19—C15 | 1.7 (2)      |
| O2—C12—C13—C20  | 79.12 (17)   | N4—C18—C19—C11  | 4.7 (2)      |
| C11—C12—C13—C20 | -164.99 (14) | C17—C18—C19—C11 | -172.93 (13) |
| C21—C12—C13—C20 | -39.86 (19)  | N4—C18—C19—C15  | 175.48 (13)  |
| O2—C12—C13—C14  | -151.05 (13) | C17—C18—C19—C15 | -2.13 (17)   |
| C11—C12—C13—C14 | -35.16 (17)  | C14—C15—C19—C11 | 25.0 (2)     |
| C21—C12—C13—C14 | 89.97 (17)   | C16—C15—C19—C11 | 152.28 (15)  |
| C20—C13—C14—C15 | -166.61 (14) | C14—C15—C19—C18 | -144.60 (13) |
| C12—C13—C14—C15 | 62.90 (17)   | C16—C15—C19—C18 | -17.37 (16)  |
| C13—C14—C15—C19 | -53.21 (16)  | O2—C12—C21—C22  | 176.83 (13)  |
| C13—C14—C15—C16 | -168.27 (14) | C11—C12—C21—C22 | 58.46 (17)   |
| C19—C15—C16—C17 | 29.21 (15)   | C13—C12—C21—C22 | -67.19 (18)  |
| C14—C15—C16—C17 | 147.50 (14)  | C12—C21—C22—C23 | -171.19 (14) |
| C15—C16—C17—C18 | -30.78 (15)  | C21—C22—C23—C24 | 178.47 (14)  |
